# Supplementary material for: Foaming-assisted electrospinning of large-pore mesoporous ZnO nanofibers with tailored structures and enhanced photocatalytic activity
Source: Royal Society of Chemistry journal article supplement (doi:10.1039/c4ra15421e), 2015-01-01
Supplement: c4ra15421e1.pdf [file c4ra15421e1.pdf]

**Electronic Supplementary Information**

**Foaming-assisted Electrospinning of Large-pore Mesoporous ZnO Nanofibers  
with Tailored Structures and Enhanced Photocatalytic Activity**

***Xiaolong Ren<sup>1,2</sup>, Pengzhan Ying<sup>1</sup>, Zuobao Yang<sup>2</sup>, Minghui Shang<sup>2</sup>, Huilin Hou<sup>2,\*</sup> and  
Fengmei Gao<sup>2,\*</sup>***

<sup>1</sup>School of Material Science and Engineering, China University of Mining and Technology,  
Xuzhou City, 221116, P.R. China.

<sup>2</sup>Institute of Materials, Ningbo University of Technology, Ningbo City, 315016, P.R. China.

**Corresponding author E-mails:** [huhuilin86@163.com](mailto:huhuilin86@163.com) (H. Hou)

[fmgao@163.com](mailto:fmgao@163.com) (F. Gao)

**Tel:** +86-574-87080966

**Fax:** +86-574-87081221

**Table S1** Physical properties of the as-obtained samples.

| <i>Samples</i> | <i>Average pore size</i><br><i>(nm)</i> | <i>Pore volume</i><br><i>(cm<sup>3</sup>/g)</i> | <i>S<sub>BET</sub></i><br><i>(m<sup>2</sup>/g)</i> |
|----------------|-----------------------------------------|-------------------------------------------------|----------------------------------------------------|
| A              | 32.9                                    | 0.068                                           | 8.23                                               |
| B              | 35.6                                    | 0.089                                           | 9.99                                               |
| C              | 33.9                                    | 0.098                                           | 11.6                                               |
| D              | 34.6                                    | 0.107                                           | 12.6                                               |
| E              | 28.1                                    | 0.066                                           | 9.44                                               |

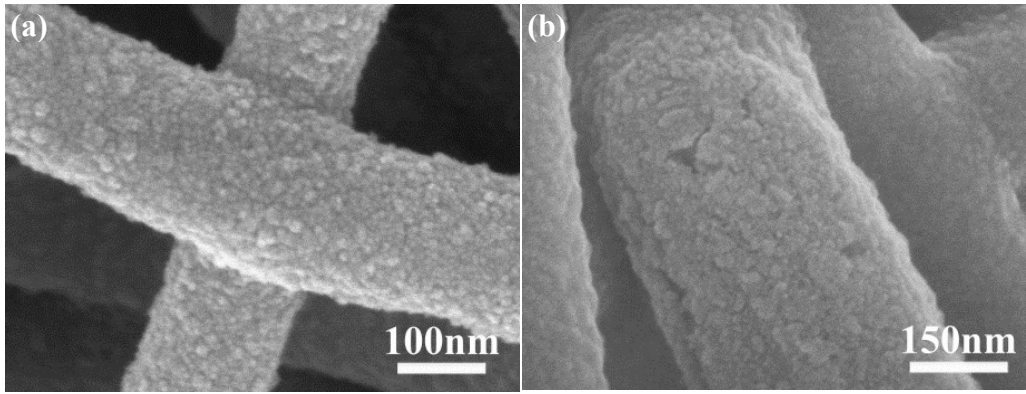

**Fig. S1** High magnification SEM images of the large-pore mesoporous precursor ZnO nanofibers calcined at 300 °C for 0.5 h.

**Table S2** Comparison of the related works for photocatalytic H<sub>2</sub> production

| <i>Material</i>                            | <i>Preparation</i> | <i>Morphology</i>     | <i>Irradiation conditions</i> | <i>Reaction solution</i>                          | <i>Activity (μmol g<sup>-1</sup>h<sup>-1</sup>)</i> | <i>Reference (year)</i> |
|--------------------------------------------|--------------------|-----------------------|-------------------------------|---------------------------------------------------|-----------------------------------------------------|-------------------------|
| <b>ZnO</b>                                 | hydrothermal       | nanorods              | 10.8 mW/cm <sup>2</sup> Hg    | Water+MeOH                                        | 120                                                 | 1                       |
| <b>ZnO/B</b>                               | thermal            | nanoparticles         | 500 W Xe                      | Na <sub>2</sub> S+Na <sub>2</sub> SO <sub>3</sub> | 577                                                 | 2                       |
| <b>ZnO/CuS</b>                             | —                  | nanoparticles         | 500 W Xe                      | Na <sub>2</sub> S+Na <sub>2</sub> SO <sub>3</sub> | 727                                                 | 3                       |
| <b>ZnO/ZnS</b>                             | thermal            | nanoparticles         | 150W Xe                       | Na <sub>2</sub> S                                 | 495                                                 | 4                       |
| <b>ZnO/SnO<sub>2-x</sub></b>               | hydrothermal       | nanoparticles         | 300 W Xe                      | Na <sub>2</sub> S+Na <sub>2</sub> SO <sub>3</sub> | 183                                                 | 5                       |
| <b>(ZnO)<sub>1</sub>/(CdS)<sub>1</sub></b> | electrospinning    | nanofibers            | 500 W Xe (visible)            | Na <sub>2</sub> S+Na <sub>2</sub> SO <sub>3</sub> | 354                                                 | 6                       |
| <b>ZnO</b>                                 | electrospinning    | nanofibers            | 300 W Xe                      | Na <sub>2</sub> S+Na <sub>2</sub> SO <sub>3</sub> | 644                                                 | Current work            |
| <b>ZnO</b>                                 | electrospinning    | mesoporous nanofibers | 300 W Xe                      | Na <sub>2</sub> S+Na <sub>2</sub> SO <sub>3</sub> | 791                                                 | Current work            |

### References

1. P. Gao, Z. Liu and D. D. Sun, *J. Mater. Chem. A*, 2013, **1**, 14262-14269.
2. P. Gomathisankar, K. Hachisuka, H. Katsumata, T. Suzuki, K. Funasaka and S. Kaneco, *ACS Sustain. Chem. Eng.*, 2013, **1**, 982-988.
3. P. Gomathisankar, K. Hachisuka, H. Katsumata, T. Suzuki, K. Funasaka and S. Kaneco, *Int. J. Hydrogen Energy*, 2013, **38**, 8625-8630.
4. E. Hong and J. H. Kim, *Int. J. Hydrogen Energy*, 2014, **39**, 9985-9993.
5. M. Li, Y. Hu, S. Xie, Y. Huang, Y. Tong and X. Lu, *Chem. Commun.*, 2014, **50**, 4341-4343.
6. G. Yang, W. Yan, Q. Zhang, S. Shen and S. Ding, *Nanoscale*, 2013, **5**, 12432-12439.
